# Supplementary material for: Long-read genome sequencing and variant reanalysis increase diagnostic yield in neurodevelopmental disorders
Source: bioRxiv or medRxiv preprint supplement (doi:10.1101/2024.03.22.24304633), 2024-03-26
Supplement: Supplementary file [file media-2.pdf]

Supplemental Table S1. Proband Variant Counts and Sequencing Metrics (n=96)

| Metric                                       | Mean      | Median    | Min       | Max       |
|----------------------------------------------|-----------|-----------|-----------|-----------|
| <b>Sequencing Metrics (* post/alignment)</b> |           |           |           |           |
| Sequenced Bases (Gb)                         | 82.7      | 80.9      | 53.5      | 131.5     |
| Read Count                                   | 5,072,597 | 4,731,572 | 3,008,914 | 8,782,703 |
| % Q20 Bases                                  | 97%       | 99%       | 93%       | 99%       |
| % Q30 Bases                                  | 94%       | 97%       | 85%       | 98%       |
| Mean Read Length (Sequenced)                 | 16,485    | 16,771    | 11,295    | 21,412    |
| <b>hg38 Alignment Metrics</b>                |           |           |           |           |
| Mean Coverage                                | 27.8      | 27.3      | 18.1      | 44.2      |
| Median Coverage                              | 27.4      | 27        | 18        | 44        |
| Percent Covered at 1x                        | 99.30%    | 99.60%    | 98.60%    | 99.70%    |
| Percent Covered at 10x                       | 97.60%    | 97.80%    | 95.10%    | 99.00%    |
| Percent Covered at 20x                       | 80.80%    | 84.90%    | 36.10%    | 97.50%    |
| Percent Covered at 30x                       | 35.80%    | 33.10%    | 1.60%     | 92.90%    |
| Aligned Mean Read Length                     | 15,648    | 15,916    | 10,955    | 20,100    |
| <b>Read Phasing Metrics</b>                  |           |           |           |           |
| % Reads Phased (WhatsHap)                    | 77.20%    | 75.80%    | 70.50%    | 86.90%    |
| Median Phase Block Length                    | 282,567   | 131,931   | 14,524    | 3,440,858 |
| N50 Phase Block Length                       | 1,096,824 | 674,583   | 37,430    | 6,163,785 |
| <b>Small Variant Metrics (DeepVariant)</b>   |           |           |           |           |
| Total Small Variants                         | 5,407,963 | 5,375,211 | 4,928,999 | 6,453,286 |
| SNVs                                         | 4,413,217 | 4,404,564 | 3,997,350 | 5,299,670 |
| Total InDels                                 | 994,746   | 970,031   | 926,286   | 1,153,616 |
| Insertions                                   | 487,206   | 475,227   | 445,212   | 572,169   |
| Deletions                                    | 482,005   | 465,574   | 445,427   | 568,143   |
| Complex Indels                               | 25,535    | 23,516    | 20,776    | 36,408    |
| SNV Ti/Tv Ratio                              | 1.867     | 1.875     | 1.75      | 1.99      |
| Het/Hom Ratio                                | 1.638     | 1.54      | 1.41      | 2.37      |
| SNV Het/Hom Ratio                            | 1.56      | 1.47      | 1.34      | 2.25      |
| Insertion Het/Hom Ratio                      | 1.98      | 1.85      | 1.74      | 2.82      |
| Deletion Het/Hom Ratio                       | 1.961     | 1.805     | 1.66      | 2.97      |
| <b>Structural Variant Metrics (pbsv)</b>     |           |           |           |           |
| Total Structural Variant Calls               | 57,203.3  | 55,586.0  | 53,834.0  | 65,120.0  |
| Deletion                                     | 25,498.4  | 24,757.0  | 23,799.0  | 29,531.0  |
| Duplication                                  | 3,093.8   | 3,016.5   | 2,820.0   | 3,649.0   |
| Insertion                                    | 28,275.5  | 27,594.0  | 26,441.0  | 32,437.0  |
| Inversion                                    | 121.2     | 121.0     | 99.0      | 155.0     |
| Breakend                                     | 200.8     | 193.0     | 124.0     | 312.0     |
| cnv                                          | 13.6      | 6.5       | 0.0       | 53.0      |

**Supplemental Table S2. Parent Variant Counts and Sequencing Metrics (n=20)**

| <b>Metric</b>                              | <b>Mean</b> | <b>Median</b> | <b>Min</b> | <b>Max</b> |
|--------------------------------------------|-------------|---------------|------------|------------|
| <b>Sequencing Metrics (post/alignment)</b> |             |               |            |            |
| <b>Sequenced Bases (Gb)</b>                | 67.64       | 66.94         | 44.39      | 88.67      |
| <b>Read Count</b>                          | 4,321,913   | 4,232,886     | 2,904,689  | 5,974,978  |
| <b>% Q20 Bases</b>                         | 98.5%       | 98.6%         | 98.1%      | 98.8%      |
| <b>% Q30 Bases</b>                         | 96.6%       | 96.7%         | 95.6%      | 97.1%      |
| <b>Mean Read Length (Sequenced)</b>        | 15,805.5    | 16,430.0      | 12,961.0   | 18,408.0   |
| <b>Mean Coverage</b>                       | 22.8        | 22.6          | 15.0       | 29.9       |
| <b>Median Coverage</b>                     | 22.4        | 22            | 15         | 30         |
| <b>Percent Covered at 1x</b>               | 99.2%       | 99.2%         | 98.8%      | 99.6%      |
| <b>Percent Covered at 10x</b>              | 96.2%       | 97.0%         | 86.1%      | 97.8%      |
| <b>Percent Covered at 20x</b>              | 65.6%       | 67.5%         | 15.4%      | 91.5%      |
| <b>Percent Covered at 30x</b>              | 14.3%       | 10.0%         | 0.8%       | 50.8%      |
| <b>Aligned Mean Read Length</b>            | 15,147      | 15,706        | 12,508     | 17,479     |
| <b>Read Phasing Metrics (n=18)*</b>        |             |               |            |            |
| <b>% Reads Phased (WhatsHap)</b>           | 77.9%       | 77.1%         | 72.1%      | 86.4%      |
| <b>Median Phase Block Length</b>           | 298,971     | 117,710       | 36,645     | 1,257,823  |
| <b>N50 Phase Block Length</b>              | 909,429     | 601,919       | 91,195     | 3,624,761  |
| <b>Small Variant Metrics (DeepVariant)</b> |             |               |            |            |
| <b>Total Small Variants</b>                | 5,151,077   | 5,010,202     | 4,930,296  | 5,975,303  |
| <b>SNVs</b>                                | 4,181,187   | 4,063,593     | 3,997,600  | 4,855,287  |
| <b>Total InDels</b>                        | 969,890     | 945,131       | 914,206    | 1,120,016  |
| <b>Insertions</b>                          | 472,690     | 461,211       | 447,360    | 541,876    |
| <b>Deletions</b>                           | 473,033     | 463,374       | 432,171    | 544,408    |
| <b>Complex Indels</b>                      | 24,168      | 22,548        | 20,198     | 33,732     |
| <b>SNV Ti/Tv Ratio</b>                     | 1.96        | 1.96          | 1.95       | 1.97       |
| <b>Het/Hom Ratio</b>                       | 1.70        | 1.63          | 1.51       | 2.37       |
| <b>SNV Het/Hom Ratio</b>                   | 1.63        | 1.56          | 1.45       | 2.25       |
| <b>Insertion Het/Hom Ratio</b>             | 2.00        | 1.92          | 1.78       | 2.79       |
| <b>Deletion Het/Hom Ratio</b>              | 2.01        | 1.90          | 1.75       | 2.92       |
| <b>Structural Variant Metrics (pbsv)</b>   |             |               |            |            |
| <b>Total Structural Variants</b>           | 57,650.0    | 56,199.0      | 55,146.0   | 64,546.0   |
| <b>Deletion</b>                            | 25,406.7    | 24,789.0      | 24,302.0   | 29,116.0   |
| <b>Duplication</b>                         | 3,369.0     | 3,294.0       | 3,147.0    | 3,779.0    |
| <b>Insertion</b>                           | 29,032.3    | 28,358.5      | 27,718.0   | 32,234.0   |
| <b>Inversion</b>                           | 355.5       | 353.0         | 335.0      | 392.0      |
| <b>Breakend</b>                            | 390.6       | 390.0         | 346.0      | 434.0      |

\* n=18 on read phasing metrics due to whatshap tags that could not properly be interpreted by cramino to generate bam phasing stats for two samples

Supplemental Table S3. Proband Structural Variant Counts (n=96)

|                                                                           | All Genomic Regions |                 |                 |                 | Refseq Exons +/- 50bp |                |                |                |
|---------------------------------------------------------------------------|---------------------|-----------------|-----------------|-----------------|-----------------------|----------------|----------------|----------------|
|                                                                           | Mean                | Median          | Min             | Max             | Mean                  | Median         | Min            | Max            |
| <b>No Allele Frequency Filter</b>                                         | <b>56,151.8</b>     | <b>54,534.5</b> | <b>52,990.0</b> | <b>64,057.0</b> | <b>2,364.7</b>        | <b>2,294.0</b> | <b>2,190.0</b> | <b>2,772.0</b> |
| <b>Deletions</b>                                                          | 25,019.7            | 24,266.0        | 23,417.0        | 29,022.0        | 1,074.6               | 1,037.0        | 959.0          | 1,278.0        |
| <b>Duplications</b>                                                       | 3,031.0             | 2,955.5         | 2,765.0         | 3,588.0         | 221.0                 | 217.0          | 188.0          | 273.0          |
| <b>Insertions</b>                                                         | 27,852.2            | 27,170.5        | 25,997.0        | 32,035.0        | 1,038.0               | 1,008.0        | 947.0          | 1,228.0        |
| <b>Inversions</b>                                                         | 116.9               | 116.0           | 94.0            | 151.0           | 26.7                  | 27.0           | 19.0           | 34.0           |
| <b>Breakends</b>                                                          | 132.0               | 125.5           | 75.0            | 214.0           | 4.4                   | 4.0            | 1.0            | 9.0            |
| <b>Rare (&lt;1% in public SV databases &amp; AC&lt;4 cohort/internal)</b> | <b>2,344.7</b>      | <b>1,720.5</b>  | <b>1,259.0</b>  | <b>5,416.0</b>  | <b>116.6</b>          | <b>87.0</b>    | <b>52.0</b>    | <b>281.0</b>   |
| <b>Deletions</b>                                                          | 1,297.3             | 933.0           | 679.0           | 3,024.0         | 69.1                  | 51.0           | 30.0           | 174.0          |
| <b>Duplications</b>                                                       | 204.1               | 146.0           | 100.0           | 491.0           | 14.3                  | 11.5           | 3.0            | 38.0           |
| <b>Insertions</b>                                                         | 810.2               | 600.5           | 395.0           | 1,991.0         | 32.1                  | 26.0           | 11.0           | 79.0           |
| <b>Inversions</b>                                                         | 4.1                 | 3.0             | 0.0             | 18.0            | 0.6                   | 0.0            | 0.0            | 4.0            |
| <b>Breakends</b>                                                          | 29.1                | 26.5            | 9.0             | 78.0            | 0.5                   | 0.0            | 0.0            | 3.0            |
| <b>Exclusive (Not in public SV databases, cohort/internal AC=1)</b>       | <b>971.5</b>        | <b>733.0</b>    | <b>477.0</b>    | <b>2,212.0</b>  | <b>51.1</b>           | <b>39.5</b>    | <b>19.0</b>    | <b>128.0</b>   |
| <b>Deletions</b>                                                          | 569.5               | 420.0           | 297.0           | 1,279.0         | 31.8                  | 25.0           | 12.0           | 80.0           |
| <b>Duplications</b>                                                       | 80.9                | 59.0            | 32.0            | 203.0           | 5.4                   | 4.0            | 0.0            | 18.0           |
| <b>Insertions</b>                                                         | 302.1               | 231.0           | 116.0           | 780.0           | 13.2                  | 11.0           | 2.0            | 34.0           |
| <b>Inversions</b>                                                         | 2.3                 | 1.0             | 0.0             | 13.0            | 0.4                   | 0.0            | 0.0            | 4.0            |
| <b>Breakends</b>                                                          | 16.7                | 15.0            | 4.0             | 56.0            | 0.3                   | 0.0            | 0.0            | 3.0            |

Public DBs: gnomad v4 (n=63,046), HPRC GIAB pbsv calls (PacBio, n=103), HGSC2 (n=45),

These stats are computed per sample from the Jasmine-merged sv callset, so the no allele frequency / all regions values differ slightly from counts reported in Supplemental Table S1.

Supplemental Table S4. Repeat region loci (hg38) and allele calls from pbsv in those regions (vs. reference).

| Chromosome | Repeat Start | Repeat End | Gene     | Repeat                       | Repeat Length | Individuals with coverage >=8 | Min Variant Length (bp) | Median Variant Length (bp) | Mean Variant Length (bp) | 90%ile Length (bp) | 95%ile Length (bp) | 99%ile Length (bp) | Max Allele Length (bp) |
|------------|--------------|------------|----------|------------------------------|---------------|-------------------------------|-------------------------|----------------------------|--------------------------|--------------------|--------------------|--------------------|------------------------|
| chrX       | 148500631    | 148500691  | AFF2     | GCC                          | 3             | 92                            | -24                     | 0                          | 3                        | 0                  | 24                 | 51                 | 81                     |
| chr2       | 100104799    | 100104824  | AFF3     | GCC                          | 3             | 96                            | 0                       | 0                          | 6                        | 0                  | 46                 | 79                 | 270                    |
| chrX       | 67545316     | 67545385   | AR       | GCA                          | 3             | 86                            | -24                     | 0                          | 0                        | 0                  | 0                  | 22                 | 24                     |
| chrX       | 25013649     | 25013698   | ARX      | GCC                          | 3             | 91                            | 0                       | 0                          | 0                        | 0                  | 0                  | 0                  | 0                      |
| chr12      | 6936716      | 6936773    | ATN1     | CAG                          | 3             | 96                            | -30                     | 0                          | -2                       | 0                  | 0                  | 0                  | 30                     |
| chr6       | 16327633     | 16327723   | ATXN1    | TGC                          | 3             | 96                            | 0                       | 0                          | 0                        | 0                  | 0                  | 21                 | 21                     |
| chr22      | 45795354     | 45795424   | ATXN10   | ATTCT                        | 5             | 96                            | -35                     | 0                          | 0                        | 0                  | 0                  | 20                 | 30                     |
| chr12      | 111598949    | 111599018  | ATXN2    | GCT                          | 3             | 96                            | 0                       | 0                          | 0                        | 0                  | 0                  | 0                  | 21                     |
| chr14      | 92071009     | 92071042   | ATXN3    | CTG                          | 3             | 96                            | 0                       | 27                         | 22                       | 45                 | 54                 | 64                 | 75                     |
| chr3       | 63912684     | 63912726   | ATXN7    | GCA                          | 3             | 96                            | 0                       | 0                          | 0                        | 0                  | 0                  | 0                  | 0                      |
| chr13      | 70139353     | 70139428   | ATXN8    | GCA                          | 3             | 96                            | -21                     | 0                          | -2                       | 0                  | 0                  | 52                 | 156                    |
| chrX       | 19990919     | 19990973   | BCLAF3   | GCC                          | 3             | 77                            | -36                     | 0                          | 0                        | 0                  | 0                  | 0                  | 0                      |
| chr16      | 66490398     | 66490467   | BEAN1    | TGGAA                        | 5             | 96                            | -25                     | 20                         | 169                      | 207                | 467                | 4233               | 9129                   |
| chr11      | 66744821     | 66744850   | C11ORF80 | GCG                          | 3             | 96                            | 0                       | 0                          | 0                        | 0                  | 0                  | 0                  | 0                      |
| chr9       | 27573528     | 27573546   | C9ORF72  | GGCCCC                       | 6             | 96                            | 0                       | 0                          | 8                        | 30                 | 42                 | 69                 | 108                    |
| chr19      | 13207858     | 13207897   | CACNA1A  | CAG                          | 3             | 95                            | 0                       | 0                          | 0                        | 0                  | 0                  | 0                  | 0                      |
| chr11      | 119206289    | 119206322  | CBL      | CGG                          | 3             | 96                            | 0                       | 0                          | 0                        | 0                  | 0                  | 0                  | 24                     |
| chr3       | 129172576    | 129172732  | CNBP     | CAGG                         | 4             | 96                            | -60                     | -20                        | -14                      | 0                  | 0                  | 0                  | 24                     |
| chr19      | 18786034     | 18786050   | COMP     | GAC                          | 3             | 96                            | 0                       | 0                          | 0                        | 0                  | 0                  | 0                  | 0                      |
| chr21      | 43776443     | 43776479   | CSTB     | CCCCGCC<br>CCGCG             | 12            | 96                            | 0                       | 0                          | 2                        | 0                  | 0                  | 0                  | 300                    |
| chr12      | 50505001     | 50505022   | DIP2B    | CGG                          | 3             | 96                            | 0                       | 0                          | 8                        | 30                 | 36                 | 61                 | 213                    |
| chr19      | 45770204     | 45770264   | DMPK     | CAG                          | 3             | 96                            | -45                     | -27                        | -28                      | 0                  | 0                  | 21                 | 27                     |
| chr17      | 80146992     | 80147139   | EIF4A3   | GCCGCTG<br>CCGACCTC<br>GCTGT | 20            | 96                            | -58                     | 20                         | 12                       | 40                 | 60                 | 60                 | 102                    |
| chrX       | 147912050    | 147912110  | FMR1     | GGC                          | 3             | 88                            | -30                     | 30                         | 24                       | 36                 | 36                 | 60                 | 69                     |
| chr3       | 138946020    | 138946063  | FOXL2    | GCG                          | 3             | 96                            | 0                       | 0                          | 0                        | 0                  | 0                  | 0                  | 0                      |
| chr10      | 93702522     | 93702547   | FRA10AC1 | CCG                          | 3             | 96                            | 0                       | 0                          | 3                        | 0                  | 21                 | 30                 | 292                    |
| chr9       | 69037261     | 69037304   | FXN      | GAA                          | 3             | 96                            | 0                       | 0                          | 4                        | 19                 | 41                 | 55                 | 79                     |
| chr19      | 14496041     | 14496074   | GIPC1    | CGG                          | 3             | 96                            | 0                       | 0                          | 0                        | 0                  | 0                  | 2                  | 24                     |
| chr2       | 190880872    | 190880920  | GLS      | GCA                          | 3             | 96                            | -24                     | 0                          | -7                       | 0                  | 0                  | 2                  | 21                     |
| chr7       | 27199825     | 27199862   | HOXA13   | GCC                          | 3             | 96                            | 0                       | 0                          | 0                        | 0                  | 0                  | 0                  | 0                      |
| chr2       | 176093058    | 176093104  | HOXD13   | GGC                          | 3             | 96                            | 0                       | 0                          | 0                        | 0                  | 0                  | 0                  | 0                      |
| chr4       | 3074876      | 3074966    | HTT      | CAG                          | 3             | 96                            | -24                     | 0                          | 1                        | 0                  | 0                  | 36                 | 42                     |
| chr16      | 87604287     | 87604329   | JPH3     | GCT                          | 3             | 96                            | 0                       | 0                          | 0                        | 0                  | 0                  | 27                 | 33                     |
| chr4       | 21713786     | 21716097   | KCNIP4   | TAAAA                        | 3             | 96                            | -257                    | -237                       | -160                     | 0                  | 0                  | 149                | 459                    |
| chr8       | 104588972    | 104589000  | LRP12    | CGG                          | 3             | 96                            | 0                       | 0                          | 0                        | 0                  | 0                  | 0                  | 21                     |
| chr5       | 10356346     | 10356412   | MARCHF6  | TTTCA                        | 5             | 95                            | -20                     | 0                          | 0                        | 0                  | 0                  | 3                  | 30                     |
| chr3       | 151367585    | 151369763  | MED12    | ATTTTC                       | 5             | 96                            | -110                    | -65                        | -49                      | 0                  | 0                  | 0                  | 0                      |
| chr9       | 110700652    | 110702927  | MUSK     | TTTAT                        | 5             | 96                            | -222                    | -94                        | -57                      | 61                 | 139                | 895                | 4262                   |
| chr15      | 22786677     | 22786701   | NOP56    | GGGCCT                       | 6             | 96                            | 0                       | 0                          | 3                        | 24                 | 24                 | 25                 | 30                     |
| chr20      | 2652733      | 2652775    | NOP56    | GGCCTG                       | 6             | 96                            | 0                       | 0                          | 3                        | 24                 | 24                 | 25                 | 30                     |

|       |           |           |            |         |    |    |     |     |     |     |     |      |      |
|-------|-----------|-----------|------------|---------|----|----|-----|-----|-----|-----|-----|------|------|
| chr1  | 146228800 | 146228821 | NOTCH2NLA  | GCC     | 3  | 93 | 0   | 0   | 0   | 0   | 0   | 0    | 0    |
| chr1  | 149390802 | 149390841 | NOTCH2NLC  | GGC     | 3  | 96 | 0   | 0   | 12  | 27  | 31  | 42   | 51   |
| chr10 | 79826383  | 79826404  | NUTM2B-AS1 | CGG     | 3  | 95 | 0   | 0   | 1   | 0   | 19  | 19   | 24   |
| chr14 | 23321472  | 23321490  | PABPN1     | GCG     | 3  | 96 | 0   | 0   | 0   | 0   | 0   | 0    | 0    |
| chr4  | 41745972  | 41746032  | PHOX2B     | GCC     | 3  | 96 | -21 | 0   | 0   | 0   | 0   | 0    | 0    |
| chr5  | 146878727 | 146878757 | PPP2R2B    | GCT     | 3  | 96 | 0   | 0   | 1   | 0   | 0   | 28   | 30   |
| chr9  | 130681606 | 130681641 | PRDM12     | GCN     | 3  | 96 | 0   | 0   | 0   | 0   | 0   | 0    | 0    |
| chr20 | 4699379   | 4699380   | PRNP       | GCAGCCT | 34 | 96 | 0   | 0   | 0   | 0   | 0   | 0    | 0    |
|       |           |           |            | CATGGTG |    |    |     |     |     |     |     |      |      |
|       |           |           |            | GTGGCTG |    |    |     |     |     |     |     |      |      |
|       |           |           |            | GGGGCAG |    |    |     |     |     |     |     |      |      |
|       |           |           |            | CCCCAT  |    |    |     |     |     |     |     |      |      |
| chr4  | 159342526 | 159342617 | RAPGEF2    | TTTCA   | 5  | 96 | -20 | 0   | 1   | 0   | 0   | 25   | 40   |
| chr4  | 39348424  | 39348479  | RFC1       | AAAAG   | 5  | 92 | -20 | 0   | 187 | 502 | 554 | 1043 | 4714 |
| chr6  | 45422750  | 45422802  | RUNX2      | GGC     | 3  | 96 | 0   | 0   | 0   | 0   | 0   | 0    | 0    |
| chr8  | 118366815 | 118366919 | SAMD12     | AAATA   | 5  | 96 | -49 | 0   | -5  | 0   | 0   | 2    | 20   |
| chrX  | 140504316 | 140504362 | SOX3       | GGC     | 3  | 94 | 0   | 0   | 0   | 0   | 0   | 0    | 0    |
| chr2  | 96197066  | 96197122  | STARD7     | AT TTC  | 5  | 96 | 0   | 0   | 18  | 25  | 82  | 354  | 867  |
| chr6  | 170561906 | 170562017 | TBP        | GCA     | 3  | 96 | -21 | 0   | 0   | 0   | 0   | 0    | 0    |
| chr18 | 55586155  | 55586227  | TCF4       | TGC     | 3  | 96 | -39 | -24 | -10 | 0   | 96  | 178  | 225  |
| chrX  | 149631763 | 149631782 | TMEM185A   | GCC     | 3  | 92 | -33 | -21 | -18 | 0   | 0   | 37   | 42   |
| chr16 | 24613439  | 24613530  | TNRC6A     | TTTCA   | 5  | 96 | -35 | -25 | -23 | 0   | 0   | 0    | 0    |
| chr1  | 1435799   | 1435820   | TRIO       | AT TTT  | 6  | 96 | 0   | 0   | 0   | 0   | 0   | 0    | 20   |
| chr16 | 17470907  | 17470923  | VWA1       | GGCGCGG | 10 | 77 | 0   | 0   | 0   | 0   | 0   | 0    | 0    |
|       |           |           |            | AGC     |    |    |     |     |     |     |     |      |      |
| chr3  | 183712187 | 183712223 | XYLT1      | CGG     | 3  | 96 | 0   | 238 | 234 | 265 | 271 | 275  | 280  |
| chr16 | 72787694  | 72787757  | YEATS2     | TTTTA   | 5  | 96 | 0   | 0   | 28  | 153 | 153 | 158  | 163  |
| chr13 | 99985448  | 99985494  | ZDHHC14    | AT TTC  | 5  | 96 | -35 | 0   | -5  | 0   | 0   | 0    | 0    |
| chr7  | 55887601  | 55887640  | ZFHX3      | RCC     | 3  | 96 | -30 | 0   | 0   | 0   | 0   | 0    | 0    |
| chr5  | 14420230  | 14422285  | ZIC2       | GCG     | 3  | 96 | -27 | 0   | 0   | 0   | 0   | 0    | 0    |
| chr6  | 157533533 | 157535600 | ZNF713     | CGG     | 3  | 95 | -94 | 0   | 0   | 0   | 0   | 35   | 51   |

**Supplemental Table S5. Sequencing Metrics Sources**

| <b>Metric</b>                                | <b>Algorithm</b>                                     | <b>Output Field Name</b>      |
|----------------------------------------------|------------------------------------------------------|-------------------------------|
| <b>Sequencing Metrics (* post/alignment)</b> |                                                      |                               |
| <b>Sequenced Bases (Gb)</b>                  | sentieon --algo QualityYield                         | TOTAL_BASES                   |
| <b>Read Count</b>                            | sentieon --algo QualityYield                         | TOTAL_READS                   |
| <b>% Q20 Bases</b>                           | sentieon --algo QualityYield                         | Q20_BASES                     |
| <b>% Q30 Bases</b>                           | sentieon --algo QualityYield                         | Q30_BASES                     |
| <b>Mean Read Length (Sequenced)</b>          | sentieon --algo QualityYield                         | READ_LENGTH                   |
| <b>Mean Coverage</b>                         | sentieon --algo WgsMetricsAlgo                       | MEAN_COVERAGE                 |
| <b>Median Coverage</b>                       | sentieon --algo WgsMetricsAlgo                       | MEDIAN_COVERAGE               |
| <b>Percent Covered at 1x</b>                 | sentieon --algo WgsMetricsAlgo                       | PCT_1X                        |
| <b>Percent Covered at 10x</b>                | sentieon --algo WgsMetricsAlgo                       | PCT_10X                       |
| <b>Percent Covered at 20x</b>                | sentieon --algo WgsMetricsAlgo                       | PCT_20X                       |
| <b>Percent Covered at 30x</b>                | sentieon --algo WgsMetricsAlgo                       | PCT_30X                       |
| <b>Aligned Mean Read Length</b>              | cramino                                              | Mean Length                   |
| <b>Read Phasing Metrics</b>                  |                                                      |                               |
| <b>% Reads Phased (WhatsHap)</b>             | cramino                                              | Fraction reads phased         |
| <b>Median Phase Block Length</b>             | cramino                                              | Median phaseblock length      |
| <b>N50 Phase Block Length</b>                |                                                      | N50 Phaseblock Length         |
| <b>Small Variant Metrics (DeepVariant)</b>   |                                                      |                               |
| <b>Total Small Variants</b>                  | rtg vcfstats                                         | Passed_Filters                |
| <b>SNVs</b>                                  | rtg vcfstats                                         | SNPs                          |
| <b>Total InDels</b>                          | rtg vcfstats                                         | (Passed_Filters - SNPs)       |
| <b>Insertions</b>                            | rtg vcfstats                                         | Insertions                    |
| <b>Deletions</b>                             | rtg vcfstats                                         | Deletions                     |
| <b>Complex Indels</b>                        | rtg vcfstats                                         | Indels                        |
| <b>SNV Ti/Tv Ratio</b>                       | rtg vcfstats                                         | SNP_Transitions_Transversions |
| <b>Het/Hom Ratio</b>                         | rtg vcfstats                                         | Total_Het_Hom_ratio           |
| <b>SNV Het/Hom Ratio</b>                     | rtg vcfstats                                         | SNP_Het_Hom_ratio             |
| <b>Insertion Het/Hom Ratio</b>               | rtg vcfstats                                         | Insertion_Het_Hom_ratio       |
| <b>Deletion Het/Hom Ratio</b>                | rtg vcfstats                                         | Deletion_Het_Hom_ratio        |
| <b>Structural Variant Metrics (pbsv)</b>     |                                                      |                               |
| <b>Total Structural Variant Calls</b>        | bcftools view -H <input.vcf>   wc -l                 | N/A                           |
| <b>Deletion</b>                              | bcftools filter -i 'SVTYPE==DEL' <input.vcf>   wc -l | N/A                           |
| <b>Duplication</b>                           | bcftools filter -i 'SVTYPE==DUP' <input.vcf>   wc -l | N/A                           |
| <b>Insertion</b>                             | bcftools filter -i 'SVTYPE==INS' <input.vcf>   wc -l | N/A                           |
| <b>Inversion</b>                             | bcftools filter -i 'SVTYPE==INV' <input.vcf>   wc -l | N/A                           |
| <b>Breakend</b>                              | bcftools filter -i 'SVTYPE==BND' <input.vcf>   wc -l | N/A                           |
| <b>cnv</b>                                   | bcftools filter -i 'SVTYPE==cnv' <input.vcf>   wc -l | N/A                           |

**Note: sentieon metrics are an implementation of Picard metrics defined here: <https://broadinstitute.github.io/picard/picard-metric-definitions.html>**
